1 **A framework for predicting potential host ranges of pathogenic viruses based on**  
2 **receptor ortholog analysis**

3

4 Guifang Du<sup>1, †, \*</sup>, Yang Ding<sup>1, †</sup>, Hao Li<sup>1, †</sup>, Xuejun Wang<sup>1, †</sup>, Junting Wang<sup>1</sup>, Yu Sun<sup>1</sup>, Huan Tao<sup>1</sup>, Xin  
5 Huang<sup>1</sup>, Kang Xu<sup>1</sup>, Hao Hong<sup>1</sup>, Shuai Jiang<sup>1</sup>, Shengqi Wang<sup>1, \*</sup>, Hebing Chen<sup>1, \*</sup> and Xiaochen Bo<sup>1,</sup>  
6 \*

7 <sup>1</sup> Beijing Institute of Radiation Medicine, Beijing 100850, China.

8 \*Corresponding authors: Tel: +8601066932251; Email: chb-1012@163.com (H.C.);  
9 boxc@bmi.ac.cn (X.B.); sqwang@bmi.ac.cn (S.W.)

10 †These authors contributed equally to this work.

11 **Abstract**

12 Viral zoonoses are a serious threat to public health and global security, as reflected by the current  
13 scenario of the growing number of severe acute respiratory syndrome coronavirus 2 (SARS-CoV-2)  
14 cases. However, as pathogenic viruses are highly diverse, identification of their host ranges remains  
15 a major challenge. Here, we present a combined computational and experimental framework, called  
16 REceptor ortholog-based POtential virus hoST prediction (REPOST), for the prediction of potential  
17 virus hosts. REPOST first selects orthologs from a diverse species by identity and phylogenetic  
18 analyses. Secondly, these orthologs is classified preliminarily as permissive or non-permissive type  
19 by infection experiments. Then, key residues are identified by comparing permissive and non-  
20 permissive orthologs. Finally, potential virus hosts are predicted by a key residue-specific weighted  
21 module. We performed REPOST on SARS-CoV-2 by studying angiotensin-converting enzyme 2  
22 orthologs from 287 vertebrate animals. REPOST efficiently narrowed the range of potential virus  
23 host species (with 95.74% accuracy).

24 **Key words: Zoonotic Virus, Receptor Orthologs, Potential Host Prediction, SARS-CoV-2**

25 **Introduction**

26 Viral zoonoses pose serious threats to public health and global security, and have caused the

27 majority of recent human pandemics [e.g., those of HIV, Ebola, severe acute respiratory syndrome  
28 (SARS), and avian influenza] (Kreuder Johnson et al., 2015; Olival et al., 2017; Stephen S et al.,  
29 2012). An understanding of the species tropism of viral transmission is thus key for the development  
30 of pandemic control programs. The global coronavirus disease 2019 (COVID-19) pandemic caused  
31 by severe acute respiratory syndrome coronavirus 2 (SARS-CoV-2, also, 2019-nCoV and COVID-  
32 19 virus) has caused an unprecedented public health and economic crisis (Zhou et al., 2020).  
33 Comparison with related coronavirus sequences has shown that SARS-CoV-2 likely originated in  
34 bats, followed by transmission to an intermediate host (Dos Santos Bezerra et al., 2020; Lam et al.,  
35 2020; Lopes, de Mattos Cardillo, & Paiva, 2020; Zhou et al., 2020). Numerous studies suggest that  
36 a diversified host range is involved in the SARS-CoV-2 pandemic outbreak (Abdel-Moneim &  
37 Abdelwhab, 2020; Hossain, Javed, Akter, & Saha, 2020). *In vivo* studies have demonstrated that  
38 mink, ferrets, cats, dogs, and some non-human primates are susceptible to SARS-CoV-2, whereas  
39 mice, white-tufted-ear marmosets, chickens, ducks, and tree shrews are not (Abdel-Moneim &  
40 Abdelwhab, 2020; Hossain et al., 2020; S. Lu et al., 2020; Oreshkova et al., 2020; Shi et al., 2020;  
41 X. Zhao et al., 2020; Y. Zhao et al., 2020). The SARS-CoV-2 outbreak is another critical example  
42 proving the existence of close, straightforward interaction among humans, animals, and  
43 environmental health that can result in the emergence of a deadly pandemic.

44 A large number of viruses, including coronavirus and influenza virus, has existed in nature for a  
45 long time (Cui, Li, & Shi, 2019; D. Liu, Ma, Jiang, & He, 2019; Olival et al., 2017; Tiwari et al.,  
46 2020; Xiaoman, Xiang, & Jie, 2020). These viruses live in and coexist with animals. They are also  
47 constantly mutating and awaiting opportunities to invade human beings. Animal surveys resulted in  
48 the discovery of many thousands of new viruses. Such research would benefit studies of viral  
49 diversity and evolution, and could determine whether and why some pathogens cross species  
50 boundaries more frequently than others (Bae & Son, 2011; Edward C, Andrew, & Kristian G, 2018;  
51 Lasso et al., 2019; Olival et al., 2017; Stephen S et al., 2012). Given the rarity of outbreaks, however,  
52 it is arrogant to imagine that we could use such surveys to predict and mitigate the emergence of  
53 disease. In addition, due to adaptive genetic recombination, the possibility that a new coronavirus  
54 or influenza virus will evolve cannot be excluded, as reflected by the current scenario of the growing  
55 number of SARS-CoV-2 cases. There is a small, but real, possibility that SARS-CoV-2 will take  
56 refuge in a new animal host and be reintroduced to humans in the future. Thus, the possibility of

57 interspecies transmission of viral infections in hot spots is of concern to human beings. As these  
58 viruses are very diverse, evaluation of the threat that they pose remains a major challenge, and  
59 efficient approaches to the rapid prediction of potential animal reservoirs are needed.

60 One way in which virologists can attempt to predict potential host species is via the cellular  
61 receptors of viruses. The recognition of and interaction with cellular receptors are critical initial  
62 steps in the infectious viral life cycle and play key regulatory roles in host range, tissue tropism, and  
63 viral pathogenesis (Maginnis, 2018). In addition, the gain of function of a virus to bind to receptor  
64 counterparts in other species is prerequisite for interspecies transmission (G. Lu, Wang, & Gao,  
65 2015). Human angiotensin-converting enzyme 2 (ACE2) has been identified as the cellular receptor  
66 for SARS-CoV-2 (Hamming et al., 2004; Zhou et al., 2020). SARS-CoV (Wenhui Li et al., 2003)  
67 and human coronavirus NL63 (Hofmann et al., 2005; Kailang Wua, Weikai Lib, Guiqing Penga, &  
68 Lia, 2009) have caused human disease previously and interact with ACE2 to gain entry into cells.  
69 ACE2 is expressed in a diverse range of species throughout the subphylum Vertebrata. The host  
70 range of SARS-CoV-2 may be extremely broad due to the conservation of ACE2 in mammals (G.  
71 Lu et al., 2015). Using *in vitro* functional assays, Liu et al. (Y. Liu et al., 2020) showed that 44  
72 mammalian ACE2 orthologs, including those of domestic animals, pets, livestock, and animals  
73 commonly found in zoos and aquaria – but not orthologs in New World monkeys – could bind the  
74 SARS-CoV-2 spike protein and support viral entry. In addition to performing receptor sequence  
75 analysis, Kerr et al. (Kerr et al., 2015) developed a combined computational and experimental  
76 approach to assess the compatibility of New World arenaviruses with potential new host species,  
77 although this method is suitable only for the rodent host range. Using the random forest machine-  
78 learning algorithm, Eng et al. (Eng, Tong, & Tan, 2014) constructed computational models for  
79 prediction of the host tropism of influenza A virus, but this method is suitable only for the avian and  
80 human host ranges. Many other computational approaches have been developed to predict  
81 bacteriophage–host relationships, but whether these methods can be applied to animal viruses is  
82 unknown (Ahlgren, Ren, Lu, Fuhrman, & Sun, 2017; Edwards, McNair, Faust, Raes, & Dutilh, 2016;  
83 Roux, Hallam, Woyke, & Sullivan, 2015).

84 With the advancement of high-throughput next-generation sequencing, the virus isolation  
85 technology that enables identification of the pathogen causing an outbreak is no longer the  
86 bottleneck it once was (Jonsdottir & Dijkman, 2016; Ko, Salem, Chang, & Chao, 2020; Zhu et al.,

87 2020). Novel and traditional techniques have proven to be extremely useful for the discovery of  
88 viral receptors; in particular, biochemical and structural analyses have provided a great deal of  
89 insight into the molecular interactions between viruses and receptors (Maginnis, 2018). In addition,  
90 the continuous enrichment of protein sequence databases has increased the number of species for  
91 which receptor protein sequences are available. These excellent conditions enable the development  
92 of approaches for the prediction of potential hosts of pathogenic viruses. In this report, we describe  
93 a combined computational and experimental approach called REceptor ortholog-based POtential  
94 virus hoST prediction (REPOST), which provides a flexible framework for the identification of  
95 potential virus hosts based on virus receptor ortholog analysis. REPOST takes virus cellular receptor  
96 orthologs from multiple species as input and predicts the possibility of undetermined species' roles  
97 as potential hosts. Using this framework, we first systematically analyzed ACE2 orthologs from 287  
98 vertebrates, primarily mammals. Then, we analyzed the binding ability of ACE2 to viruses from 16  
99 representative species in a pseudovirus infection experiment. Thereafter, we identified 95 key ACE2  
100 residues that may destroy ACE2–SARS-CoV-2 interaction. Finally, we used a residue-weighted  
101 calculation method to predict the possibility of ACE2 as a receptor in unknown species. The  
102 accuracy of the framework is very high, as proven by the second functional experiment.

103

## 104 **Results**

### 105 **Design and comprehensive features of the REPOST workflow**

106 REPOST application requires the following dependences: (1) known cellular receptor of the virus,  
107 (2) the availability of receptor orthologs from most species [we recommend downloading receptor  
108 protein sequences from the National Center for Biotechnology Information (NCBI) database], and  
109 (3) ability to perform an *in vitro* virus or pseudovirus infection experiment (See Methods). The  
110 REPOST workflow is as follows (Fig. 1). (1) Receptor orthologs are selected for the following  
111 infection experiment based on identity and phylogenetic analyses among various species. The  
112 species of the selected orthologs should be representative of taxonomic groups (e.g., primates,  
113 rodents, carnivores, bats, marsupials, birds) and should better to be frequently in close contact with  
114 humans. And the orthologs should have high degrees of relative identity with those from known

115 virus hosts. (2) Each selected ortholog is preliminarily classified as permissive or non-permissive  
116 (meaning that cells with the ortholog overexpression is or is not permissive of virus entry) by  
117 performing virus or pseudovirus infection experiment. In addition, published experimental evidence  
118 can also be used to supplement our classification. At least three orthologs of each type are needed.  
119 (3) Key residues are identified by comparing permissive and non-permissive orthologs (for details,  
120 see the SARS-CoV-2 example). (4) Potential virus hosts are predicted by a key residue-specific  
121 weighted module.

122 Taken together, based on a combination of virus infection experiments and computational analysis,  
123 REPOST can be used to extrapolate, on a large scale, the possibility of undetected species being  
124 virus hosts.

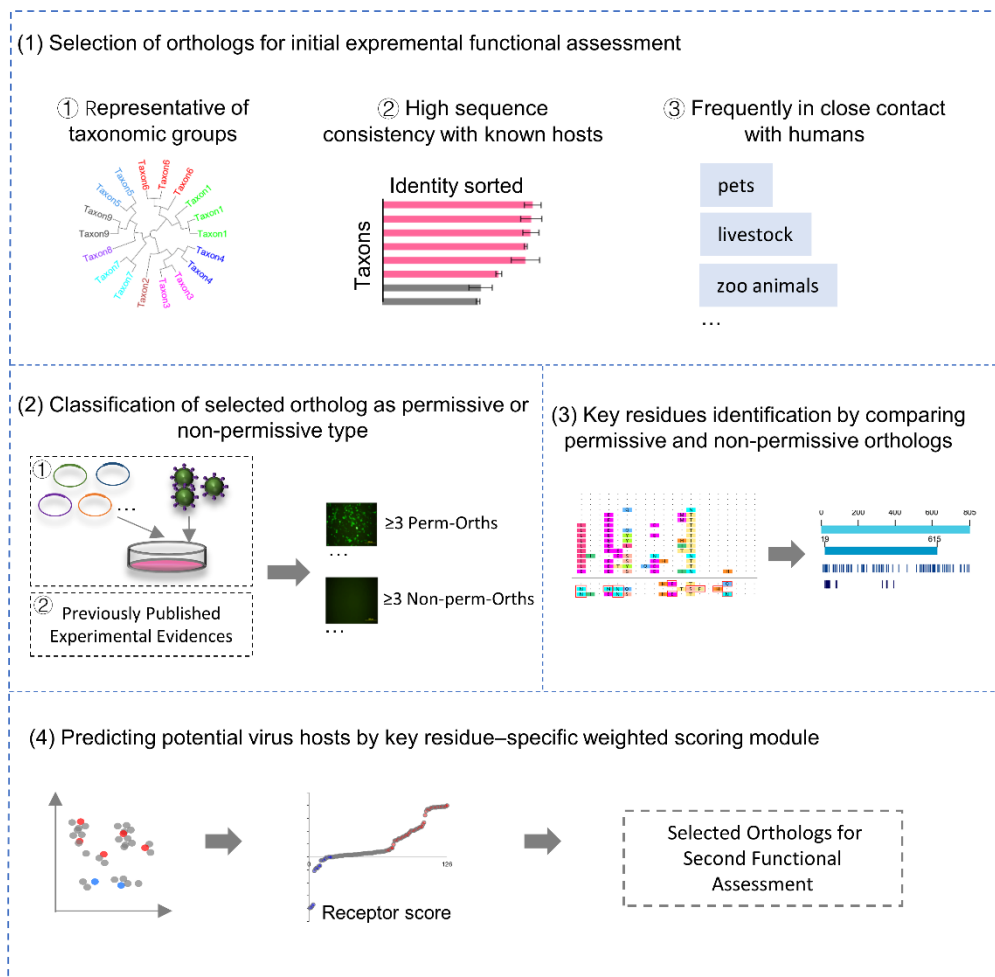

125

126 Figure 1. REPOST design and workflow.

127

## 128 **Application of REPOST to predicting potential host range of SARS-Cov-2**

### 129 *Selection of ACE2 orthologs from various species by identity and phylogenetic analysis*

130 We collected the DNA, mRNA, and protein sequences of ACE2 orthologs from 287 vertebrate  
131 animals from the NCBI database. These species were mammals (n = 126), birds (n = 73), amphibians  
132 (n = 4), bony fishes (n = 66), lizards (n = 9), and other chordates (n = 10). The mammals were  
133 primates (n = 26), rodents (n = 23), carnivores (n = 23), whales and dolphins (n = 10), bats (n = 13),  
134 even-toed ungulates (n = 14), marsupials (n = 4), and other placental species (n = 13) (Fig. 2A). The  
135 length ranged from 6694 to 107639 bp for DNA sequences, and 1035 to 7004 bp for mRNA  
136 sequences (Fig. S1A, B). Protein sequences contained 344 to 862 amino-acid residues, and the  
137 length in 25% of species was the same as that of human (805 amino-acid residues) (Fig. S1C).

138 We first performed the phylogenetic analysis, and found that ACE2 orthologs from the same taxon  
139 were usually clustered into the same branch. (Fig. S2). Also, we analyzed the identities of all  
140 sequences pairwise, the result indicate that the ACE2 protein sequences were highly conserved  
141 across each taxon examined, as well as each subclass of mammals (Fig. 2B), suggesting that we can  
142 start classification with a few representatives from each taxon. Then, we ranked the identity of ACE2  
143 among all species taxon to humans, and the result yielded the following order from high to low was  
144 as below: primates, rodents, carnivores, other placental species, even-toed ungulates, whales and  
145 dolphins, bats, marsupials, birds, other chordates, amphibians, lizards, and bony fishes (Fig. 2C).  
146 Based on the ranking result, we found that ACE2 in other vertebrate species except mammals had  
147 low consistency with that of human, suggesting they were not likely to be potential hosts or  
148 reservoirs for SARS-CoV-2. Previous study has supported our observation that poultry (belong to  
149 birds) is not susceptible to SARS-CoV-2(Shi et al., 2020). We finally chose 16 representative ACE2  
150 orthologs (very similar to that of humans) from mammals (include primates, rodents, carnivores,  
151 bats, and even-toed ungulates) for following analysis. (Fig. 3). Among these species are wild  
152 animals, zoo animals, pets, and livestock that are frequently in close contact with humans, and model  
153 animals used in biomedical research.

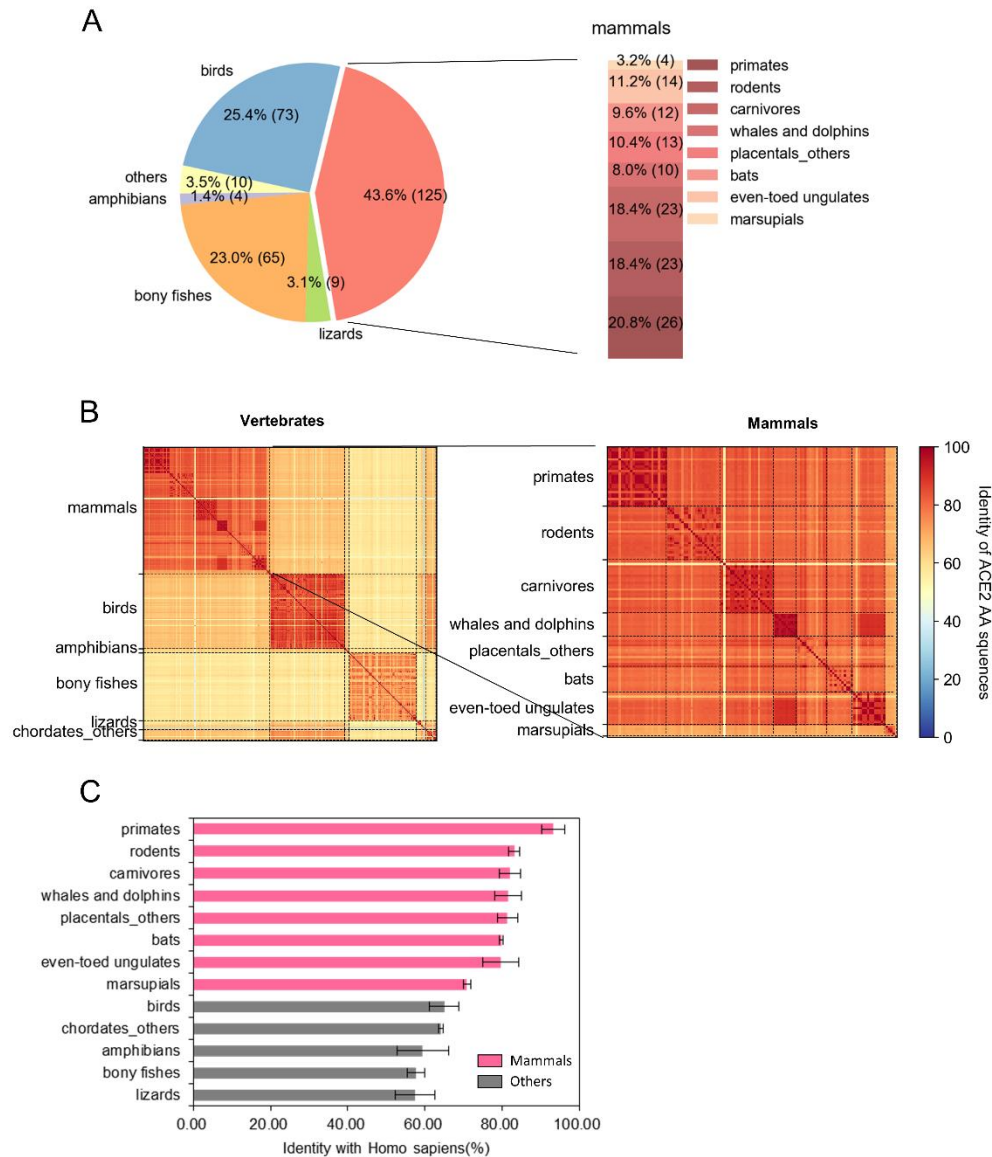

154

155 Figure 2. Identity analyses of ACE2 orthologs from 287 vertebrates. (A) Amino-acid sequences of

156 ACE2 in 287 vertebrates from the NCBI dataset. Bar of pie chart showing the numbers and

157 proportions of species in each group. (B) Left: ACE2 identity matrices for 126 mammals. Right:

158 enlargement of a portion of the left panel. (C) Ranked consistency of ACE2 among all species to

159 humans. Values are expressed as means of identity for each taxon with standard deviations (SDs;

160 error bars).

161

162 *Classification of permissive and non-permissive ACE2 orthologs by infection experiment in vitro*

163 We infected BHK-21 cells ectopically expressing individual selected ACE2 orthologs with



164 SARS-CoV-2 pseudovirus particles. As expected, BHK-21 cells lacking endogenous ACE2  
165 expression were not permissive of SARS2pp infection. BHK-21 cells expressing ACE2s from *Homo*  
166 *sapiens*, *Felis catus*, *Manis javanica*, *Canis lupus familiaris*, *Equus caballus*, *Capra hircus*, *Sus*  
167 *scrofa*, *Ursus arctos horribilis*, *Camelus ferus*, *Bos taurus*, *Oryctolagus cuniculus*, *Paguma larvata*  
168 and *Macaca mulatta* were permissive of SARS2pp entry. ACE2s from *Eptesicus fuscus* and *Mus*  
169 *musculus* were not permissive of SARS2pp entry cells (Fig. 3A). The luciferase activity of different  
170 ACE2 orthologs of vector-transfected cells was consistent with the eGFP signals (Fig. 3B). Besides,  
171 we regarded ACE2 of *Rhinolophus sinicus*, *Chlorocebus sabaeus*, and *Macaca fascicularis* as  
172 permissive, and regarded *Callithrix jacchus* as non-permissive orthologs respectively, as published  
173 experimental evidence proved that ACE2 of *R. sinicus* could mediate SARS-CoV-2 entry into HeLa  
174 cells(Zhou et al., 2020), *Chlorocebus sabaeus*(Cross et al., 2020), and *Macaca fascicularis*(S. Lu et  
175 al., 2020) were susceptible to SARS-CoV-2 infection, and yet *C. jacchus* was not susceptible to  
176 SARS-CoV-2 infection(S. Lu et al., 2020).

177 Taken together, we eventually get 17 permissive and 3 non-permissive ACE2 orthologs. These  
178 orthologs would be used for the identification of key residues which changes of them may damage  
179 the ACE2-SARS-CoV-2 interaction.



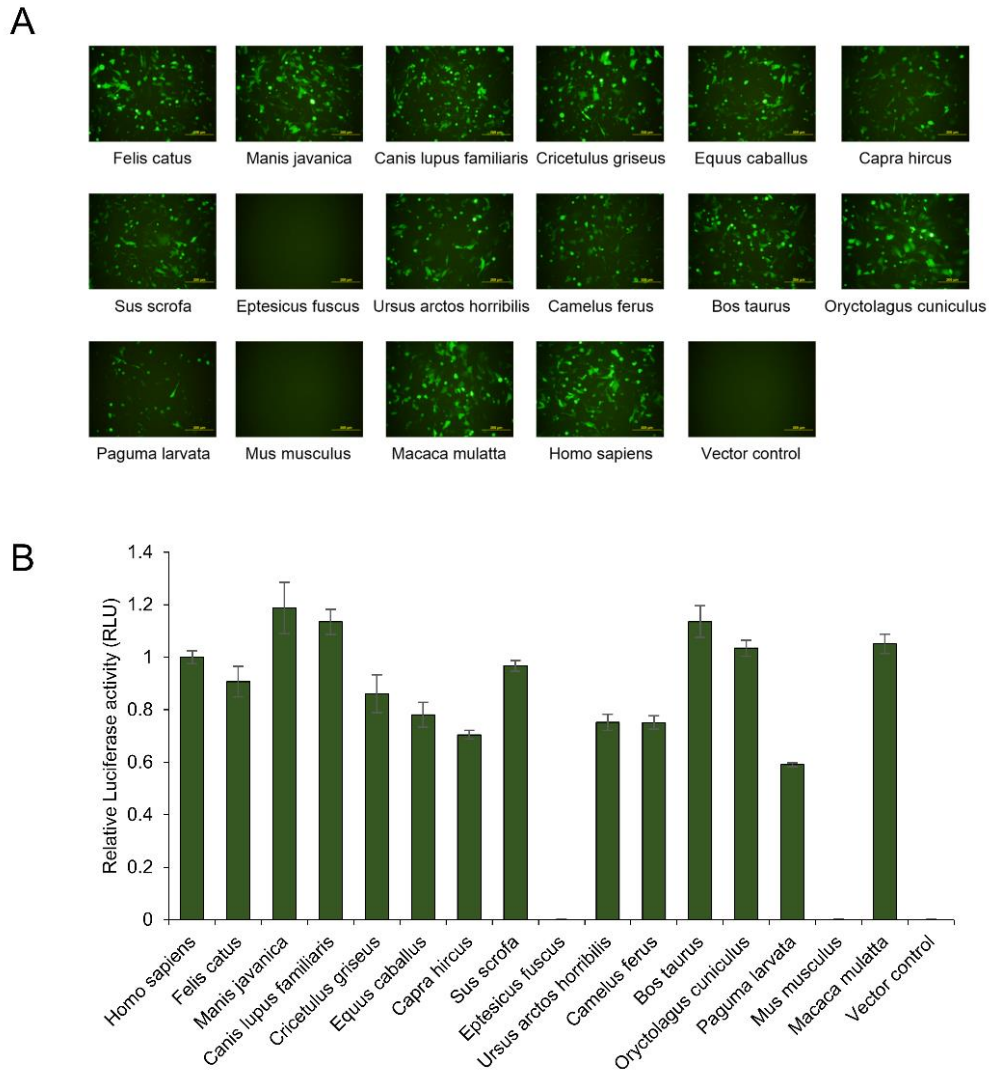

180

181 Figure 3. Functional assessment of ACE2 orthologs mediating SARS-CoV-2 pseudovirus particle  
182 (SARS2pp) entry. BHK-21 cells transfected with ACE2 orthologs or empty vectors were infected  
183 with SARS2pps (MOI = 3). (A) Expression of the eGFP protein, visualized by fluorescence  
184 microscopy. (B) Luciferase activity of different ACE2 orthologs in vector-transfected cells at 60 h  
185 after SARS2pp infection. Values are expressed as means with standard deviations (SDs; error bars).

186

187 *Identification of key residues by comparing permissive and non-permissive ACE2 orthologs*

188 After sequence comparison, we found 33 ACE2 protein residues of *M. musculus*, 20 residues of  
189 *C. jacchus*, and 50 residues of *E. fuscus* that differed from those of all SARS-CoV-2-permissive  
190 species (Fig. 4A, Table S1). Take the residues at the ACE2–SARS-CoV-2 interaction interface as an

191 example, we found that substitutions in residues Q24, D30, K31, E42, M82, Y83, K353, and G354  
 192 that distinguished ACE2s of *C. jacchus*, *M. musculus*, and *E. fuscus* from those of all permissive  
 193 species (Fig. 4B). These residues may be the key sites affecting the ACE2–SARS-CoV-2 binding.

194 The ACE2 orthologs were characterized by a peptidase M2 domain (PD) which located outside  
 195 the cell membrane and mediates virus binding, and a collectrin domain. In PD, there are 20 amino-  
 196 acid residues located in the ACE2–SARS-CoV-2 contact interface (Lan et al., 2020; Renhong Yan  
 197 et al., 2020; Wang et al., 2020; Wrapp. et al., 2020), and these residues are critical for virus  
 198 recognition (Lan et al., 2020). The 75 of identified residues were located in the PD and 8 were  
 199 located at the ACE2–SARS-CoV-2 interface (Fig. 4 B, C). We believed that the changes in amino  
 200 acids at these sites might have a greater influence on the destruction of ACE2–SARS-CoV-2 binding  
 201 than do changes at other sites.

202

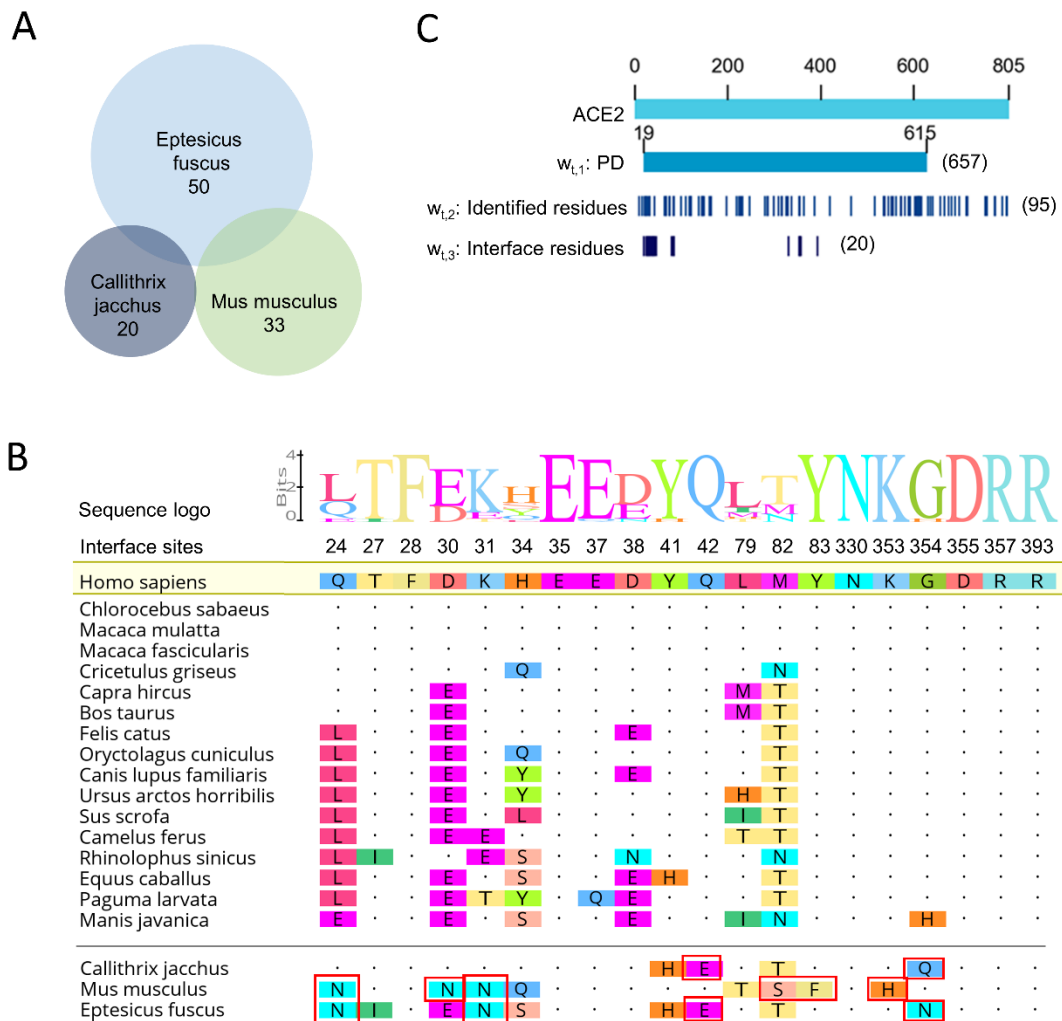

203

204 Figure 4. Identification of key residues and ACE2 residues at the interface with the viral spike  
205 protein. (A) Schematic depicting the identification of key differential ACE2 amino-acid sites, via  
206 the identification of distinctions between non-permissive ACE2 ortholog and all permissive  
207 orthologs. (B) Top: Sequence logos of the residues at S protein interfaces for all 17 permissive ACE2  
208 orthologs. Bottom: Alignment of contacting residues from 17 permissive and 3 non-permissive  
209 ACE2 orthologs. Only amino acids that differ from those of humans are shown. Red boxes indicate  
210 ACE2 residues that may be key to the destruction of interaction with SARS-CoV-2. (C) Schematic  
211 diagram of the residues in the PD, the 95 key residues identified above, and the contact surface with  
212 the SARS-CoV-2 S protein of ACE2.

213

#### 214 *Prediction of SARS-CoV-2 potential hosts by key residue-specific weighted module*

215 Based on the above work, we developed a residue-specific weighted module for the prediction of  
216 susceptibility of untested mammal species (Figure 5A). The module takes as input multiple receptor  
217 orthologs, which including permissive, non-permissive orthologs from tested species and orthologs  
218 from other species to predict. It will first calculate a residue-weighted distance matrix for all  
219 orthologs taking into account three priors of the PD domain, the 95 key residues and the contact  
220 surface with SARS-CoV-2 S protein (Fig. 4C). We then used this distance matrix to select as  
221 potentially permissive (or non-permissive) candidates orthologs that were much closer to known  
222 permissive (or non-permissive) orthologs than to known non-permissive (or permissive) orthologs  
223 (Methods).

224 The optimized distance matrix clearly separated known permissive and non-permissive orthologs,  
225 with no discernible mixing (Fig. 5B), as supported by independent experimental evidence (Y. Liu et  
226 al., 2020) (Fig. 5B; see also Table S2 for a full list of predictions for all 56 or 20 orthologs close to  
227 known permissive or non-permissive orthologs). Also, it displayed excellent performance in the  
228 extrapolation of non-permissive orthologs (which are currently scarce and potentially critical to the  
229 mechanistic understanding of SARS-CoV-2 tropism), with 9 of 11 identifications validated by  
230 subsequent assay of pseudovirus entry into BHK-21 cells (Fig. 5C). The other two orthologs showed  
231 only weak infection positivity (infection rates < 35%).

232 Taken together, REPOST, combined of phylogenetic analysis, experimental functional  
233 assessment, and residues-specific weighted module, provide an efficient framework for screening  
234 key residues of virus receptor that determine virus–receptor interaction and assessing the potential  
235 host ranges of pathogenic viruses. Compared with other methods based on molecular docking or  
236 simple molecular consistency analysis (Kerr et al., 2015; Y. Liu et al., 2020), REPOST has higher  
237 accuracy and a wider range of applications. In SARS-CoV-2 case, we found that ACE2 orthologs  
238 from a wide range of mammals, including pets, livestock, and animals commonly kept in zoos or  
239 aquaria, could act as functional receptors to mediate SARS-CoV-2 infection. Many of these species  
240 have been proved in previous experimental evidence (Abdel-Moneim & Abdelwhab, 2020; Hossain  
241 et al., 2020). This suggest that SARS-CoV-2 might have a broad host tropism and underscore the  
242 necessity to monitor susceptible hosts to prevent future outbreaks. In addition, we identified 10  
243 previously unrecognized non-permissive ortholog sequences from primate, rodent, bat, and  
244 marsupial species. We also predicted that species other than mammals were not likely to be the host  
245 of SARS-CoV-2, as all non-mammalian ACE2 orthologs were too dissimilar from known  
246 permissive orthologs (Fig. S3A).

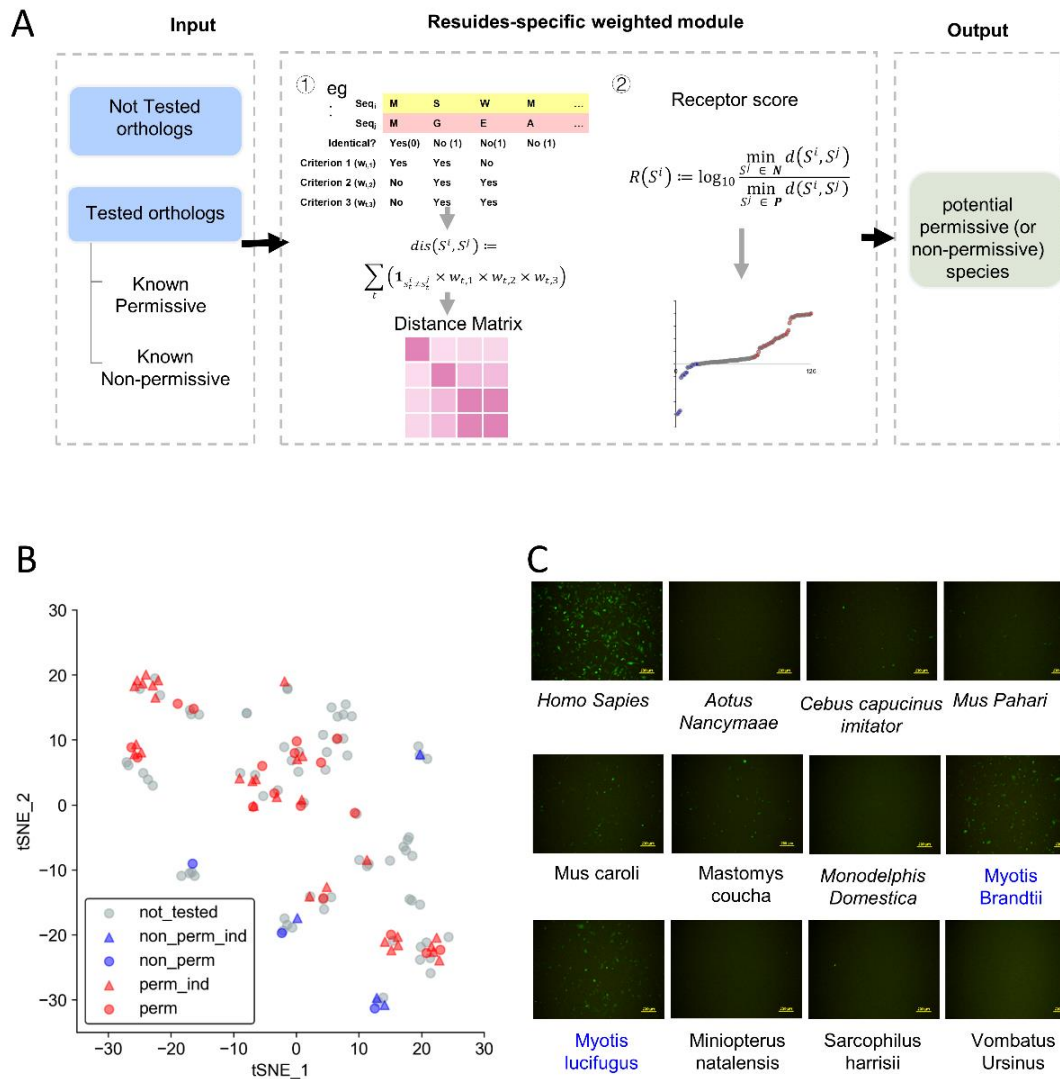

247

248 Figure 5. The residue-specific weighted prediction module. (A) Schematic diagram showing the  
 249 workflow of the residue-specific weighted calculation model. (B) t-SNE projection plot showing  
 250 the clustering results for ACE2 orthologs from 126 mammals. perm, ACE2 orthologs permissive of  
 251 SARS2pp entry (see Figure 3); non\_perm, ACE2 orthologs not permissive of SARS2pp entry  
 252 (Figure 3); perm\_ind, ACE2 orthologs permissive of SARS2pp entry according to independent  
 253 research (Y. Liu et al., 2020); non\_perm\_ind, ACE2 orthologs not permissive of SARS2pp entry  
 254 according to independent research (Y. Liu et al., 2020); not\_tested, ACE2 orthologs that had never  
 255 been tested. (C) Functional assessment of SARS2pp entry mediation of predicted non-permissive  
 256 ACE2 orthologs.

257

## 258 Discussion

259 This study introduces and demonstrates the use of REPOST for the identification of potential  
260 virus hosts, using ACE2 receptor orthologs of SARS-CoV-2 as an example. This method showed a  
261 high host prediction accuracy. Our results suggest that SARS-CoV-2 cellular receptor ACE2  
262 orthologs are strongly conserved across mammalian species, indicating the importance of the  
263 physiological function of ACE2. Furthermore, the protein sequence diversity of ACE2 was greater  
264 among bats than among other tested mammals, and ACE2 orthologs of bats were located on two  
265 distant branches of the evolutionary tree, highlighting the possibility that bat species act as reservoirs  
266 of SARS-CoV-2 or its progenitor viruses. Notably, we also found that ACE2 orthologs from a wide  
267 range of mammals, including pets (e.g., cats and dogs), livestock (e.g., pigs, cattle, rabbits, sheep,  
268 horses, and goats), and animals commonly kept in zoos or aquaria, could act as functional receptors  
269 to mediate SARS-CoV-2 infection when ectopically expressed in BHK-21 cells, suggesting that  
270 SARS-CoV-2 has a diverse range of hosts and intermediate hosts. These findings highlight the  
271 importance of the surveillance of animals in close contact with humans as potential zoonotic  
272 reservoirs. These results suggest that the potential host of the virus is related to the phylogeny of the  
273 species to a certain extent, but it is not accurate to predict based on this solely. Based on our  
274 experimental results, we identified 95 differences in amino-acid residues between SARS-CoV-2–  
275 permissive and –non-permissive ACE2 orthologs, eight of which are located at the ACE2–S protein  
276 interface. Some of these residues have been confirmed in other studies (F. Li, 2013; W. Li et al.,  
277 2005; Procko, 2020). The final prediction results were satisfactory and consistent with independent  
278 experimental evidence<sup>28</sup>, and the module showed excellent performance in the extrapolation of non-  
279 permissive orthologs. It is worth mentioning that the analysis identified 10 previously unrecognized  
280 non-permissive ortholog sequences from primate, rodent, bat, and marsupial species. These findings  
281 will enrich negative datasets, increasing the accuracy of the screening of key residues that affect  
282 virus–receptor interaction, and will aid the establishment and training of optimized predictive  
283 models.

284 We propose that REPOST will strengthen the ability to rapidly identify potential hosts of new  
285 pathogenic viruses affecting not only humans, but also animals. Another advantage of REPOST is  
286 the ease of key residue screening, which may lead to the identification of promising targets for the

287 development of broad-spectrum antiviral therapies. REPOST can also be applied in other cases; for  
288 viruses with more than one cellular receptor, for example, all receptor orthologs can be used as input  
289 for systematic analysis. When the viral receptor cannot be identified, sequence information for all  
290 cellular membrane proteins can be integrated as input for prediction. REPOST, however, can be  
291 further improved. Other factors, such as transmembrane protease serine 2 (TMPRSS2) and the host  
292 immune response, can affect the susceptibility of animals (Bourgonje et al., 2020; Hoffmann et al.,  
293 2020). In some cases, viruses must open numerous “locks,” which can be conceptualized as a  
294 doorknob plus a deadbolt, to invade cells. In future research, we will explore the use of different  
295 sources of virus and host information to analyze the impacts of different characteristics on prediction  
296 results. In summary, the establishment of the REPOST predictive framework may be of great  
297 significance for the prevention and control of future outbreaks.

## 298 **Materials and methods**

### 299 **Protein sequence identity and phylogenetic analyses**

300 The amino-acid sequences of ACE2 orthologs from 287 vertebrates were downloaded from the  
301 National Center for Biotechnology Information (NCBI) database (<https://www.ncbi.nlm.nih.gov/>).  
302 Numbers in each sequence correspond to GenBank (<https://www.ncbi.nlm.nih.gov/genbank/>)  
303 accession numbers. ACE2 protein sequence identity, defined as the percentage of identical residues  
304 between two sequences, was analyzed using MEGA-X software (version 10.05) (Kumar, Stecher,  
305 Li, Knyaz, & Tamura, 2018) and the MUltiple Sequence Comparison by Log-Expectation  
306 (MUSCLE) algorithm (Edgar, 2004). Then, a phylogenetic tree was built using the minimum-  
307 evolution method with MEGA-X.

### 308 **Expression vector and cell lines**

309 The cDNAs encoding ACE2 orthologs tagged with hexa-histidine were synthesized and cloned  
310 into a pCAG vector derived from pcDNA3 by replacement of the CMV promoter with the CAG  
311 promoter. All constructs were verified by Sanger sequencing. BHK-21 cells were maintained in  
312 Dulbecco’s modified Eagle medium (DMEM, Gibco) supplemented with 10% (vol/vol) fetal bovine



313 serum (Gibco), 1 mM sodium pyruvate (Gibco), 1× non-essential amino acids (Gibco), and 50 IU/ml  
314 penicillin/streptomycin (Gibco) in a humidified 5% (vol/vol) CO<sub>2</sub> incubator at 37°C.

### 315 **Pseudovirus infection of BHK21 cells expressing ACE2 orthologs**

316 BHK-21 cells were seeded at  $1 \times 10^4$  cells per well in 96-well plates 12–18 h before transfection.  
317 The cells were then transfected with 100 ng control or ACE2 orthologs expressing plasmids with  
318 GenJet™ reagent (ver. II; SignaGen). The culture medium was refreshed 6–8 h after transfection.  
319 Another 6–16 h later, cells in each well were infected with SARS-CoV-2 pseudovirus bearing dual-  
320 reported genes (eGFP and luciferase) at an MOI of 3 or 10. The culture medium was changed 12 h  
321 after infection. At 60–72 h post-infection, images of eGFP expression were captured under a  
322 fluorescent microscope (IX73; Olympus) and luciferase activity was detected with the Steady-  
323 Lumi™ II Firefly luciferase assay kit (Beyotime).

### 324 **Details of the prioritization module**

325 The weighted (Manhattan) distance for each pair of ortholog sequences  $S^i, S^j$  was defined as

$$326 \quad d(S^i, S^j | w_t := \{w_{t,1}, w_{t,2}, w_{t,3}\}) := \sum_t \left( \mathbf{1}_{s_t^i \neq s_t^j} \times w_{t,1} \times w_{t,2} \times w_{t,3} \right),$$

327 where  $\mathbf{1}_{s_t^i \neq s_t^j}$  is the indicator function that takes 1 when the residues of  $S^i$  and  $S^j$  at the  $t$ th  
328 position of the alignment differ (i.e.,  $s_t^i \neq s_t^j$ ) and 0 otherwise, and  $w_t := \{w_{t,1}, w_{t,2}, w_{t,3}\}$  are  
329 weights for the following three priors: (1) whether the residue at this position in the human ortholog  
330 is in the PD ( $w_{t,1}$ ) (Wang et al., 2020), (2) how much residue composition at this position differs  
331 between all permissive and non-permissive species from the experiment ( $w_{t,2}$ ), and (3) whether the  
332 residue at this position in the human ortholog is on the contact surface ( $w_{t,3}$ ) (Lan et al., 2020). For  
333 MUSCLE alignment, we used default parameters and removed all positions at which the human  
334 ortholog was gapped.

335 The optimal  $w_t$  was selected from the 1,000 possible combinations listed in Table S3 to  
336 maximize the following separation score:

$$337 \quad \sum_{S^i \in P, S^j \in N} \frac{\text{distance between } S^i \text{ and } S^j \text{ neighborhoods}}{\max(S^i \text{ neighborhood size, } S^j \text{ neighborhood size)}}$$

$$338 \quad := \sum_{S^i \in \mathbf{P}, S^j \in \mathbf{N}} \frac{\min_{S^k \in \mathbf{U}(S^i|w_t), S^l \in \mathbf{U}(S^j|w_t)} d(S^k, S^l|w_t)}{\max \left( \max_{S^k \in \mathbf{U}(S^i|w_t)} d(S^i, S^k|w_t), \max_{S^l \in \mathbf{U}(S^j|w_t)} d(S^j, S^l|w_t) \right)},$$

339 where  $\mathbf{P}$  and  $\mathbf{N}$  are the sets of sequences of known permissive and non-permissive orthologs,  
340 respectively, and  $\mathbf{U}(S^i|w_t)$  are the three orthologs closest to  $S^i$  in the distance matrix weighted  
341 by  $w_t$ . Ideally, this score should be high when the distance matrix separates the pair of  
342 neighborhoods of most pairs of known permissive and non-permissive orthologs. The optimized  
343 weights are  $\{w_{t,1} = 10, w_{t,2} = 10, w_{t,3} = 10\}$ . Finally, we prioritized the orthologs using the  
344 following receptor score  $R(S^i)$ :

$$345 \quad R(S^i) := \log_{10} \frac{\min_{S^j \in \mathbf{N}} d(S^i, S^j | \{w_{t,1} = 10, w_{t,2} = 10, w_{t,3} = 10\})}{\min_{S^j \in \mathbf{P}} d(S^i, S^j | \{w_{t,1} = 10, w_{t,2} = 10, w_{t,3} = 10\})}.$$

346 All orthologs with  $R(S^i) \geq 0.5$  (candidate permissives) and  $R(S^i) \leq 0$  (candidate non-  
347 permissives) were then prioritized (Table S2). All 11 candidates non-permissives except  
348 *Ornithorhynchus anatinus* and *Myotis davidii* (whose residue conformations at the S protein contact  
349 surfaces were extremely similar to that of human ACE2) were tested experimentally.

## 350 Acknowledgements

351 This work was supported by the Beijing Nova Program of Science and Technology  
352 (<https://mis.kw.beijing.gov.cn>; no. Z191100001119064 to HC), the National Natural Science  
353 Foundation of China (<http://www.nsf.gov.cn>; nos. 31801112, 61873276, 31900488 and 81830101  
354 to HC, XB, HL and SW respectively), the Beijing Natural Science Foundation  
355 (<http://kw.beijing.gov.cn/>; no. 5204040 to HL), the Beijing Nova Program  
356 (<https://mis.kw.beijing.gov.cn>; no. Z171100001117119 to XW) and the Medical Innovation Project  
357 (no. 17SAZ13 to XW).

## 358 Competing interests

359 All the authors declare that they have no competing interests.

360 **References**

- 361 Abdel-Moneim, A. S., & Abdelwhab, E. M. (2020). Evidence for SARS-CoV-2 Infection of  
362 Animal Hosts. *Pathogens*, *9*(7). doi:10.3390/pathogens9070529
- 363 Ahlgren, N. A., Ren, J., Lu, Y. Y., Fuhrman, J. A., & Sun, F. (2017). Alignment-free  
364  $\$d_2^*$  oligonucleotide frequency dissimilarity measure improves prediction of hosts from  
365 metagenomically-derived viral sequences. *Nucleic Acids Res*, *45*(1), 39-53.  
366 doi:10.1093/nar/gkw1002
- 367 Bae, S. E., & Son, H. S. (2011). Classification of viral zoonosis through receptor pattern analysis.  
368 *BMC Bioinformatics*, *12*, 96. doi:10.1186/1471-2105-12-96
- 369 Bourgonje, A. R., Abdulle, A. E., Timens, W., Hillebrands, J. L., Navis, G. J., Gordijn, S. J., . . .  
370 van Goor, H. (2020). Angiotensin-converting enzyme-2 (ACE2), SARS-CoV-2 and  
371 pathophysiology of coronavirus disease 2019 (COVID-19). *J Pathol*. doi:10.1002/path.5471
- 372 Cross, R. W., Agans, K. N., Prasad, A. N., Borisevich, V., Woolsey, C., Deer, D. J., . . . Geisbert,  
373 T. W. (2020). Intranasal exposure of African green monkeys to SARS-CoV-2 results in acute phase  
374 pneumonia with shedding and lung injury still present in the early convalescence phase. *Res Sq*.  
375 doi:10.21203/rs.3.rs-50023/v2
- 376 Cui, J., Li, F., & Shi, Z. L. (2019). Origin and evolution of pathogenic coronaviruses. *Nat Rev*  
377 *Microbiol*, *17*(3), 181-192. doi:10.1038/s41579-018-0118-9
- 378 Dos Santos Bezerra, R., Valenca, I. N., de Cassia Ruy, P., Ximenez, J. P. B., da Silva Junior, W.  
379 A., Covas, D. T., . . . Slavov, S. N. (2020). The novel coronavirus SARS-CoV-2: From a zoonotic  
380 infection to coronavirus disease 2019. *J Med Virol*. doi:10.1002/jmv.26072
- 381 Edgar, R. C. (2004). MUSCLE: a multiple sequence alignment method with reduced time and  
382 space complexity. *BMC Bioinformatics*, *5*, 113. doi:10.1186/1471-2105-5-113
- 383 Edward C, Holmes, Andrew, Rambaut, & Kristian G, Andersen (2018). Pandemics spend on  
384 surveillance, not prediction. *Nature*.
- 385 Edwards, R. A., McNair, K., Faust, K., Raes, J., & Dutilh, B. E. (2016). Computational  
386 approaches to predict bacteriophage-host relationships. *FEMS Microbiol Rev*, *40*(2), 258-272.  
387 doi:10.1093/femsre/fuv048
- 388 Eng, C. L., Tong, J. C., & Tan, T. W. (2014). Predicting host tropism of influenza A virus proteins

389 using random forest. *BMC Med Genomics*, 7 Suppl 3, S1. doi:10.1186/1755-8794-7-S3-S1

390 Hamming, I., Timens, W., Bulthuis, M. L., Lely, A. T., Navis, G., & van Goor, H. (2004). Tissue  
391 distribution of ACE2 protein, the functional receptor for SARS coronavirus. A first step in  
392 understanding SARS pathogenesis. *J Pathol*, 203(2), 631-637. doi:10.1002/path.1570

393 Hoffmann, M., Kleine-Weber, H., Schroeder, S., Kruger, N., Herrler, T., Erichsen, S., . . .  
394 Pohlmann, S. (2020). SARS-CoV-2 Cell Entry Depends on ACE2 and TMPRSS2 and Is Blocked  
395 by a Clinically Proven Protease Inhibitor. *Cell*, 181(2), 271-280 e278.  
396 doi:10.1016/j.cell.2020.02.052

397 Hofmann, H., Pyrc, K., van der Hoek, L., Geier, M., Berkhout, B., & Pohlmann, S. . (2005).  
398 Human Coronavirus NL63 Employs the Severe Acute Respiratory Syndrome Coronavirus Receptor  
399 for Cellular Entry. 102, 7988–7993. doi:10.1073/pnas.0409465102

400 Hossain, M. G., Javed, A., Akter, S., & Saha, S. (2020). SARS-CoV-2 host diversity: An update  
401 of natural infections and experimental evidence. *J Microbiol Immunol Infect.*  
402 doi:10.1016/j.jmii.2020.06.006

403 Jonsdottir, H. R., & Dijkman, R. (2016). Coronaviruses and the human airway: a universal  
404 system for virus-host interaction studies. *Viol J*, 13, 24. doi:10.1186/s12985-016-0479-5

405 Kailang Wua, Weikai Lib, Guiqing Penga, & Lia, Fang. (2009). Crystal structure of NL63  
406 respiratory coronavirus receptor-binding domain complexed with its human receptor. *Proceedings*  
407 *of the National Academy of Sciences of the United States of America*, 106, 19970–19974.  
408 doi:10.1073/pnas.0908837106

409 Kerr, S. A., Jackson, E. L., Lungu, O. I., Meyer, A. G., Demogines, A., Ellington, A. D., . . .  
410 Sawyer, S. L. (2015). Computational and Functional Analysis of the Virus-Receptor Interface  
411 Reveals Host Range Trade-Offs in New World Arenaviruses. *J Virol*, 89(22), 11643-11653.  
412 doi:10.1128/JVI.01408-15

413 Ko, H. Y., Salem, G. M., Chang, G. J., & Chao, D. Y. (2020). Application of Next-Generation  
414 Sequencing to Reveal How Evolutionary Dynamics of Viral Population Shape Dengue  
415 Epidemiology. *Front Microbiol*, 11, 1371. doi:10.3389/fmicb.2020.01371

416 Kreuder Johnson, C., Hitchens, P. L., Smiley Evans, T., Goldstein, T., Thomas, K., Clements,  
417 A., . . . Mazet, J. K. (2015). Spillover and pandemic properties of zoonotic viruses with high host  
418 plasticity. *Sci Rep*, 5, 14830. doi:10.1038/srep14830

- 419 Kumar, S., Stecher, G., Li, M., Knyaz, C., & Tamura, K. (2018). MEGA X: Molecular  
420 Evolutionary Genetics Analysis across Computing Platforms. *Mol Biol Evol*, *35*(6), 1547-1549.  
421 doi:10.1093/molbev/msy096
- 422 Lam, T. T., Jia, N., Zhang, Y. W., Shum, M. H., Jiang, J. F., Zhu, H. C., . . . Cao, W. C. (2020).  
423 Identifying SARS-CoV-2-related coronaviruses in Malayan pangolins. *Nature*, *583*(7815), 282-285.  
424 doi:10.1038/s41586-020-2169-0
- 425 Lan, J., Ge, J., Yu, J., Shan, S., Zhou, H., Fan, S., . . . Wang, X. (2020). Structure of the SARS-  
426 CoV-2 spike receptor-binding domain bound to the ACE2 receptor. *Nature*, *581*(7807), 215-220.  
427 doi:10.1038/s41586-020-2180-5
- 428 Lasso, G., Mayer, S. V., Winkelmann, E. R., Chu, T., Elliot, O., Patino-Galindo, J. A., . . . Shapira,  
429 S. D. (2019). A Structure-Informed Atlas of Human-Virus Interactions. *Cell*, *178*(6), 1526-1541  
430 e1516. doi:10.1016/j.cell.2019.08.005
- 431 Li, F. (2013). Receptor recognition and cross-species infections of SARS coronavirus. *Antiviral*  
432 *Res*, *100*(1), 246-254. doi:10.1016/j.antiviral.2013.08.014
- 433 Li, W., Zhang, C., Sui, J., Kuhn, J. H., Moore, M. J., Luo, S., . . . Farzan, M. (2005). Receptor  
434 and viral determinants of SARS-coronavirus adaptation to human ACE2. *EMBO J*, *24*(8), 1634-  
435 1643. doi:10.1038/sj.emboj.7600640
- 436 Liu, D., Ma, Y., Jiang, X., & He, T. (2019). Predicting virus-host association by Kernelized  
437 logistic matrix factorization and similarity network fusion. *BMC Bioinformatics*, *20*(Suppl 16), 594.  
438 doi:10.1186/s12859-019-3082-0
- 439 Liu, Yinghui, Hu, Gaowei, Wang, Yuyan, Zhao, Xiaomin, Ji, Fansen, Ren, Wenlin, . . . Ding,  
440 Qiang. (2020). Functional and Genetic Analysis of Viral Receptor ACE2 Orthologs Reveals a Broad  
441 Potential Host Range of SARS-CoV-2. *BioRxiv*. doi:10.1101/2020.04.22.046565
- 442 Lopes, L. R., de Mattos Cardillo, G., & Paiva, P. B. (2020). Molecular evolution and  
443 phylogenetic analysis of SARS-CoV-2 and hosts ACE2 protein suggest Malayan pangolin as  
444 intermediary host. *Braz J Microbiol*. doi:10.1007/s42770-020-00321-1
- 445 Lu, G., Wang, Q., & Gao, G. F. (2015). Bat-to-human: spike features determining 'host jump' of  
446 coronaviruses SARS-CoV, MERS-CoV, and beyond. *Trends Microbiol*, *23*(8), 468-478.  
447 doi:10.1016/j.tim.2015.06.003
- 448 Lu, Shuaiyao, Zhao, Yuan, Yu, Wenhai, Yang, Yun, Gao, Jiahong, Wang, Junbin, . . . Peng,

- 449 Xiaozhong. (2020). Comparison of SARS-CoV-2 infections among 3 species of non-human  
450 primates. doi:10.1101/2020.04.08.031807
- 451 Maginnis, M. S. (2018). Virus-Receptor Interactions: The Key to Cellular Invasion. *J Mol Biol*,  
452 *430*(17), 2590-2611. doi:10.1016/j.jmb.2018.06.024
- 453 Olival, K. J., Hosseini, P. R., Zambrana-Torrel, C., Ross, N., Bogich, T. L., & Daszak, P. (2017).  
454 Host and viral traits predict zoonotic spillover from mammals. *Nature*, *546*(7660), 646-650.  
455 doi:10.1038/nature22975
- 456 Oreshkova, Nadia, Molenaar, Robert-Jan, Vreman, Sandra, Harders, Frank, Munnink, Bas B.  
457 Oude, Hakze, Renate, . . . Stegeman, Arjan. (2020). SARS-CoV2 infection in farmed mink,  
458 Netherlands, April 2020. *BioRxiv*. doi:10.1101/2020.05.18.101493
- 459 Procko, Erik. (2020). The sequence of human ACE2 is suboptimal for binding 2 the S spike  
460 protein of SARS coronavirus 2. *BioRxiv*. doi:10.1101/2020.03.16.994236
- 461 Renhong Yan, Yuanyuan Zhang, Yaning Li, Lu Xia, Yingying Guo, & Zhou, Qiang. (2020).  
462 Structural basis for the recognition of SARS-CoV-2 by full-length human ACE2. *Science*.
- 463 Roux, S., Hallam, S. J., Woyke, T., & Sullivan, M. B. (2015). Viral dark matter and virus-host  
464 interactions resolved from publicly available microbial genomes. *Elife*, *4*. doi:10.7554/eLife.08490
- 465 Shi, J., Wen, Z., Zhong, G., Yang, H., Wang, C., Huang, B. , . . . Zhigao Bu1, 3†. (2020).  
466 Susceptibility of ferrets, cats, dogs, and different domestic animals to SARS-coronavirus-2. *Science*.
- 467 Stephen S, Morse, Jonna A K, Mazet, Mark, Woolhouse, Colin R, Parrish, Dennis, Carroll,  
468 William B, Karesh , . . . Peter, Daszak. (2012). Prediction and prevention of the next pandemic  
469 zoonosis *Lancet*.
- 470 Tiwari, R., Dhama, K., Sharun, K., Iqbal Yattoo, M., Malik, Y. S., Singh, R., . . . Rodriguez-  
471 Morales, A. J. (2020). COVID-19: animals, veterinary and zoonotic links. *Vet Q*, *40*(1), 169-182.  
472 doi:10.1080/01652176.2020.1766725
- 473 Wang, Q., Zhang, Y., Wu, L., Niu, S., Song, C., Zhang, Z., . . . Qi, J. (2020). Structural and  
474 Functional Basis of SARS-CoV-2 Entry by Using Human ACE2. *Cell*, *181*(4), 894-904 e899.  
475 doi:10.1016/j.cell.2020.03.045
- 476 Wenhui Li, Michael J. Moore, Natalya Vasilieva, Jianhua Sui, Swee Kee Wong, Michael A.  
477 Berne, . . . Farzan, Michael. (2003). Angiotensin-converting Enzyme 2 Is a Functional Receptor for  
478 the SARS Coronavirus. *Nature*, *426*, 450-454. doi:10.1038/nature02145

479 Wrapp., Daniel, Wang., Nianshuang, Corbett., Kizzmekia S, Goldsmith., Jory A, Hsieh., Ching-  
480 Lin, Abiona., Olubukola, . . . McLellan., Jason S. (2020). Cryo-EM Structure of the 2019-nCoV  
481 Spike in the Prefusion Conformation. *Science*.

482 Xiaoman, Wei, Xiang, Li, & Jie, Cui. (2020). Evolutionary perspectives on novel coronaviruses  
483 identified in pneumonia cases in China. *National Science Review*.

484 Zhao, X., Chen, D., Szabla, R., Zheng, M., Li, G., Du, P., . . . Lin, H. (2020). Broad and  
485 differential animal ACE2 receptor usage by SARS-CoV-2. *J Virol*. doi:10.1128/JVI.00940-20

486 Zhao, Yuan, Wang, Junbin, Kuang, Dexuan, Xu, Jingwen, Yang, Mengli, Ma, Chunxia, . . . Peng,  
487 Xiaozhong. (2020). Susceptibility of tree shrew to SARS-CoV-2 infection.  
488 doi:10.1101/2020.04.30.029736

489 Zhou, Peng, Yang, Xing-Lou, Wang, Xian-Guang, Hu, Ben, Zhang, Lei, Zhang, Wei, . . . Shi,  
490 Zheng-Li. (2020). A pneumonia outbreak associated with a new coronavirus of probable bat origin.  
491 *Nature*, 579(7798), 270-273. doi:10.1038/s41586-020-2012-7

492 Zhu, N., Zhang, D., Wang, W., Li, X., Yang, B., Song, J., . . . Research, Team. (2020). A Novel  
493 Coronavirus from Patients with Pneumonia in China, 2019. *N Engl J Med*, 382(8), 727-733.  
494 doi:10.1056/NEJMoa2001017

495



## 1 Supplementary Data

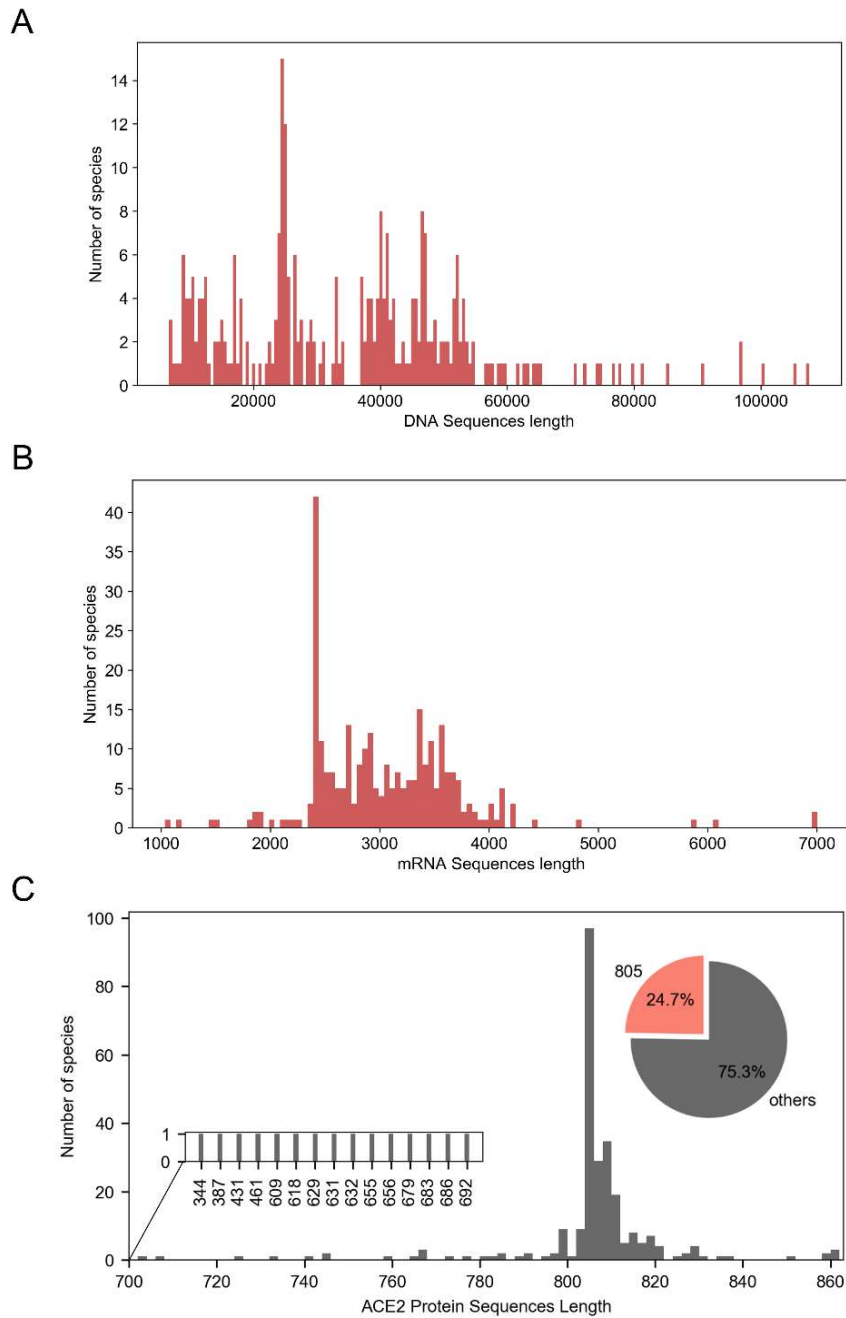

2

3 Supplementary Figure 1. Frequency distributions of ACE2 DNA (A; bin width = 500) and mRNA

4 (B; bin width = 50) sequence lengths in 286 vertebrates. (C) Frequency distribution of the ACE2

5 amino-acid sequence length in 287 vertebrates. Pie chart showing the relative proportions of species

6 with the same ACE2 amino-acid lengths as humans and others. Bin width = 1.

7

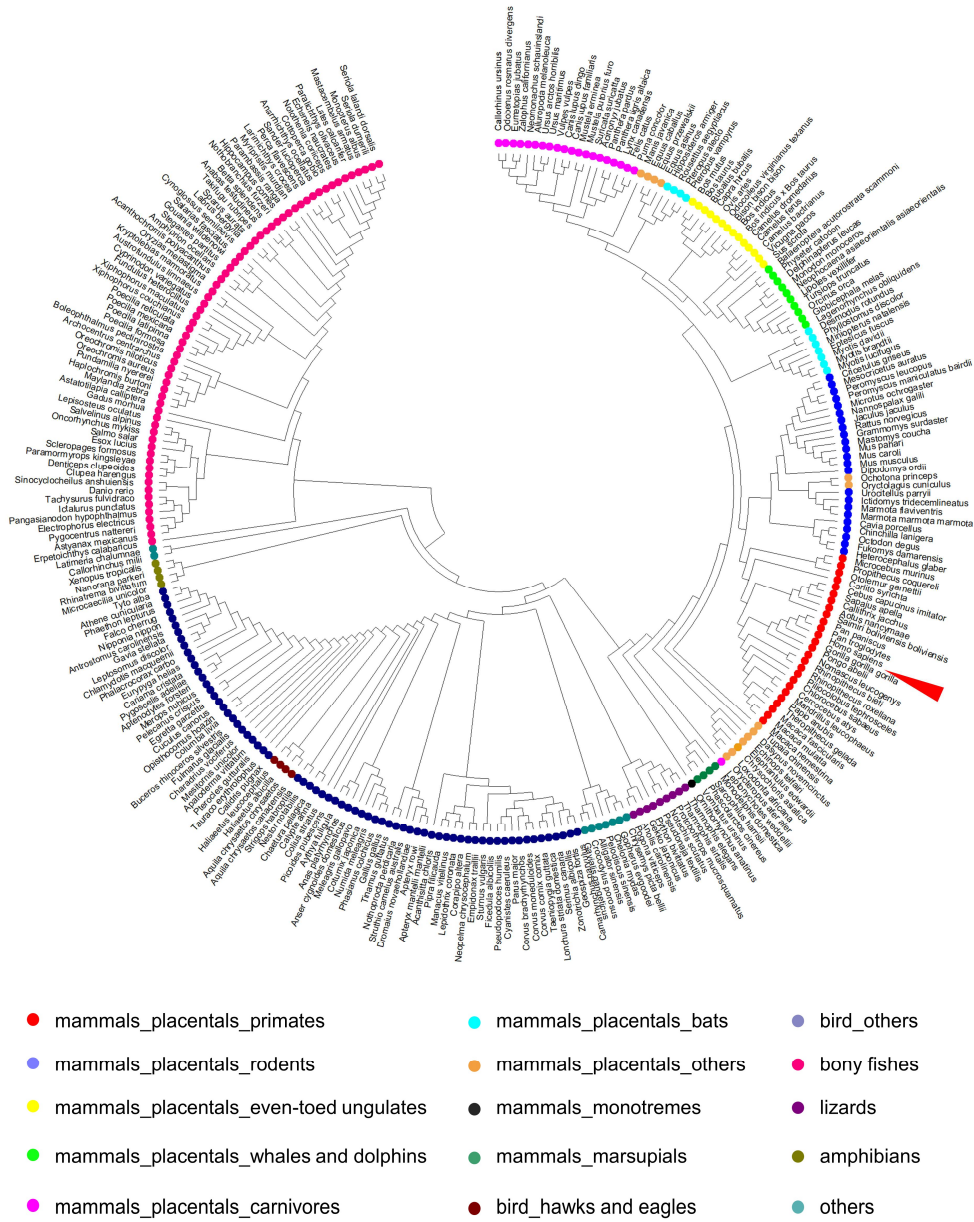

8

9 Supplementary Figure 2. Evolution tree for whole ACE2 amino-acid sequences, built using the

10 minimum-evolution method with the MEGA-X software (ver. 10.05) and the MUSCLE algorithm.

11 Species of different taxa are represented by different colors.

12

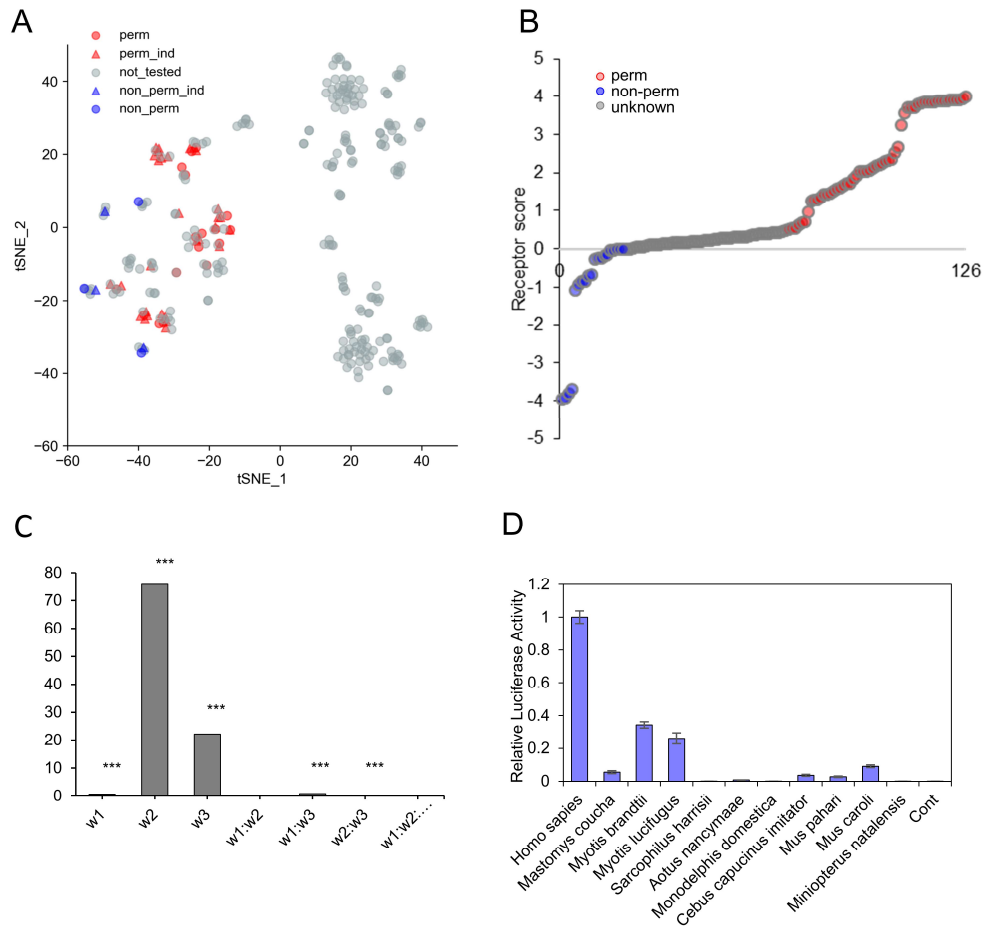

13

14 Supplementary Figure 3. Evaluation of the residue-specific weighted calculation module. (A) t-SNE  
 15 projection plot showing the clustering results for ACE2 orthologs from 287 vertebrates. perm, ACE2  
 16 orthologs permissive of SARS2pp entry (Figure 3); non\_perm, ACE2 orthologs not permissive of  
 17 SARS2pp entry (Figure 3); perm\_ind, ACE2 orthologs permissive of SARS2pp entry, according to  
 18 independent research<sup>28</sup>; non\_perm\_ind, ACE2 orthologs not permissive of SARS2pp entry,  
 19 according to independent research<sup>28</sup>; not\_tested, ACE2 orthologs that had never been tested. (B)  
 20 Scatter plot of receptor scores for all mammals. (C) Top: schematic diagram of. Bottom:  
 21 Multivariable variance results of residue-specific weighted calculation module. \*\*\* $p < 0.001$ . (D)  
 22 Relative luciferase activity of different ACE2 orthologs in vector-transfected cells at 60 h after  
 23 SARS2pp infection. Values are expressed as means with standard deviations (SDs; error bars).

24

25 Supplementary Table 1. Key inconsistent residues between permissive and non-permissive

26 orthologs

| P <sup>1</sup> | Permissive <sup>2</sup> | EF <sup>3</sup> | P <sup>1</sup> | Permissive <sup>2</sup> | MM <sup>3</sup> | P <sup>1</sup> | Permissive <sup>2</sup> | CJ <sup>3</sup> |
|----------------|-------------------------|-----------------|----------------|-------------------------|-----------------|----------------|-------------------------|-----------------|
| 8              | L                       | F               | 20             | T, I                    | L               | 42             | Q                       | E               |
| 23             | E, D                    | K               | 24             | Q, E, L                 | N               | 43             | S                       | N               |
| 24             | Q, E, L                 | N               | 30             | D, E                    | N               | 70             | S                       | F               |
| 26             | K, E                    | T               | 31             | K, E, T                 | N               | 73             | L, Y                    | F               |
| 31             | K, E, T                 | N               | 63             | N, D                    | S               | 118            | T, E, S                 | I               |
| 42             | Q                       | E               | 82             | M, N, T                 | S               | 120            | L                       | I               |
| 66             | G, R, A, E              | D               | 83             | Y                       | F               | 137            | N, T, K                 | Y               |
| 67             | E, A, D                 | S               | 91             | L, D, S, V, T, A        | P               | 147            | G                       | D               |
| 75             | E                       | K               | 160            | E, Q, R                 | S               | 172            | V                       | I               |
| 99             | A, I                    | V               | 197            | K, E                    | N               | 218            | N, S                    | Y               |
| 109            | S                       | T               | 246            | A, T                    | R               | 316            | V                       | A               |
| 117            | N, T                    | S               | 286            | G, R, E                 | A               | 354            | G, H                    | Q               |
| 121            | N, S                    | T               | 298            | V, E, K, L              | M               | 364            | V                       | T               |
| 143            | L, V, A                 | T               | 309            | K, E                    | Q               | 546            | N                       | S               |
| 145            | D, E                    | -               | 329            | E, G, D, N              | A               | 698            | T, A, S, N, P           | I               |
| 146            | P                       | S               | 337            | G, S                    | A               | 739            | V                       | I               |
| 149            | N, D                    | E               | 353            | K                       | H               | 786            | I, L, M                 | F               |
| 164            | A                       | V               | 387            | A, M, I, V, T, E, S     | R               | 791            | N, S                    | D               |
| 223            | I, M                    | T               | 465            | K, S, Q                 | R               | 799            | D                       | E               |
| 227            | E                       | D               | 535            | H                       | Y               | 800            | D                       | E               |
| 231            | E, T, A, K, S           | L               | 536            | E, D                    | N               |                |                         |                 |
| 280            | S, P                    | N               | 538            | P, A                    | S               |                |                         |                 |
| 299            | N, D, K                 | E               | 556            | N, Q, E                 | K               |                |                         |                 |
| 315            | F                       | Y               | 562            | K, R, E                 | N               |                |                         |                 |
| 316            | V                       | M               | 589            | E                       | Q               |                |                         |                 |
| 325            | Q, E                    | P               | 593            | T, V                    | D               |                |                         |                 |

|     |                  |   |     |            |   |
|-----|------------------|---|-----|------------|---|
| 354 | G, H             | N | 636 | N          | T |
| 420 | S, N, A, T       | G | 641 | Y          | F |
| 516 | Y                | F | 657 | E, K, S    | I |
| 536 | E, D             | Q | 666 | G, E, V    | L |
| 552 | Q, K             | N | 682 | N, I, S, K | Y |
| 568 | L, Y, K          | F | 774 | A          | T |
| 572 | N, R, I, G, H, D | K | 801 | V, I       | A |
| 574 | V                | T |     |            |   |
| 581 | V                | A |     |            |   |
| 603 | F, S, Y          | - |     |            |   |
| 607 | S, N, D          | H |     |            |   |
| 608 | T                | S |     |            |   |
| 610 | W                | - |     |            |   |
| 611 | S, T, R          | - |     |            |   |
| 612 | P                | - |     |            |   |
| 613 | Y                | - |     |            |   |
| 666 | G, E, V          | R |     |            |   |
| 675 | L, K             | V |     |            |   |
| 689 | K, G, A, N, Q    | T |     |            |   |
| 713 | D                | A |     |            |   |
| 758 | V, I             | G |     |            |   |
| 774 | A                | P |     |            |   |
| 776 | S, G, T, R       | N |     |            |   |
| 785 | D                | N |     |            |   |

27 <sup>1</sup> P: Position on human ACE2.

28 <sup>2</sup> Permissive: Types of residues of 17 orthologs permissive SARS-CoV-2 entry cell.

29 <sup>3</sup> Residues of ACE2 orthologs from *Eptesicus fuscus*(EF), *Mus musculus*(MM), *Callithrix*  
30 *jacchus*(CJ). ‘-’: denotes a gap in alignment.

31

32

33

Supplementary Table 2. Predict outcomes of SARS-CoV-2 potential hosts

| <b>Receptor score</b> | <b>NCBI_ID</b> | <b>Species</b>          | <b>Predict outcomes</b> |
|-----------------------|----------------|-------------------------|-------------------------|
| 3.99                  | ACT66275.1     | Rhinolophus sinicus     | Permissive              |
| 3.94                  | XP_017505752.1 | Manis javanica          | Permissive              |
| 3.91                  | NP_001297119.1 | Mustela putorius furo   | Permissive              |
| 3.90                  | XP_010991717.1 | Camelus dromedarius     | Permissive              |
| 3.90                  | XP_010966303.1 | Camelus bactrianus      | Permissive              |
| 3.90                  | XP_006194263.1 | Camelus ferus           | Permissive              |
| 3.88                  | XP_026333865.1 | Ursus arctos horribilis | Permissive              |
| 3.88                  | NP_001116542.1 | Sus scrofa              | Permissive              |
| 3.87                  | NP_001158732.1 | Canis lupus familiaris  | Permissive              |
| 3.87                  | NP_001034545.1 | Felis catus             | Permissive              |
| 3.86                  | XP_001490241.1 | Equus caballus          | Permissive              |
| 3.85                  | NP_001277036.1 | Capra hircus            | Permissive              |
| 3.84                  | XP_002719891.1 | Oryctolagus cuniculus   | Permissive              |
| 3.84                  | NP_001019673.2 | Bos taurus              | Permissive              |
| 3.83                  | AAX63775.1     | Paguma larvata          | Permissive              |
| 3.80                  | XP_003503283.1 | Cricetulus griseus      | Permissive              |
| 3.71                  | NP_001129168.1 | Macaca mulatta          | Permissive              |
| 3.70                  | XP_005593094.1 | Macaca fascicularis     | Permissive              |
| 3.69                  | NP_068576.1    | Homo sapiens            | Permissive              |
| 3.56                  | XP_008542995.1 | Equus przewalskii       | Permissive              |
| 3.24                  | XP_005903173.1 | Bos mutus               | Permissive              |
| 2.66                  | XP_011733506.1 | Macaca nemestrina       | Permissive              |
| 2.52                  | XP_030160839.1 | Lynx canadensis         | Permissive              |
| 2.36                  | XP_025790417.1 | Puma concolor           | Permissive              |
| 2.33                  | XP_008694637.1 | Ursus maritimus         | Permissive              |

|      |                |                                        |            |
|------|----------------|----------------------------------------|------------|
| 2.29 | XP_025227847.1 | <i>Theropithecus gelada</i>            | Permissive |
| 2.24 | XP_006041602.1 | <i>Bubalus bubalis</i>                 | Permissive |
| 2.20 | XP_007989304.1 | <i>Chlorocebus sabaeus</i>             | Permissive |
| 2.17 | XP_021788732.1 | <i>Papio anubis</i>                    | Permissive |
| 2.13 | XP_011850923.1 | <i>Mandrillus leucophaeus</i>          | Permissive |
| 2.07 | XP_019273508.1 | <i>Panthera pardus</i>                 | Permissive |
| 2.04 | XP_018874749.1 | <i>Gorilla gorilla gorilla</i>         | Permissive |
| 2.04 | XP_016798468.1 | <i>Pan troglodytes</i>                 | Permissive |
| 2.04 | XP_008972428.1 | <i>Pan paniscus</i>                    | Permissive |
| 1.92 | XP_007090142.1 | <i>Panthera tigris altaica</i>         | Permissive |
| 1.82 | XP_027389728.1 | <i>Bos indicus</i> x <i>Bos taurus</i> | Permissive |
| 1.71 | XP_025292925.1 | <i>Canis lupus dingo</i>               | Permissive |
| 1.71 | NP_001124604.1 | <i>Pongo abelii</i>                    | Permissive |
| 1.65 | XP_002930657.1 | <i>Ailuropoda melanoleuca</i>          | Permissive |
| 1.60 | XP_011891199.1 | <i>Cercocebus atys</i>                 | Permissive |
| 1.56 | XP_032187677.1 | <i>Mustela erminea</i>                 | Permissive |
| 1.52 | XP_019811719.1 | <i>Bos indicus</i>                     | Permissive |
| 1.46 | XP_023054821.1 | <i>Ptilocolobus tephroscele</i>        | Permissive |
| 1.44 | XP_003261132.2 | <i>Nomascus leucogenys</i>             | Permissive |
| 1.43 | XP_025842513.1 | <i>Vulpes vulpes</i>                   | Permissive |
| 1.34 | XP_011961657.1 | <i>Ovis aries</i>                      | Permissive |
| 1.29 | XP_010364367.2 | <i>Rhinopithecus roxellana</i>         | Permissive |
| 1.27 | XP_005074266.1 | <i>Mesocricetus auratus</i>            | Permissive |
| 1.25 | XP_014713133.1 | <i>Equus asinus</i>                    | Permissive |
| 0.98 | XP_020768965.1 | <i>Odocoileus virginianus</i> t        | Permissive |
| 0.70 | XP_006973269.1 | <i>Peromyscus maniculatus</i> b        | Permissive |
| 0.68 | XP_028743609.1 | <i>Peromyscus leucopus</i>             | Permissive |
| 0.62 | XP_006212709.1 | <i>Vicugna pacos</i>                   | Permissive |
| 0.55 | XP_027970822.1 | <i>Eumetopias jubatus</i>              | Permissive |



|      |                |                          |            |
|------|----------------|--------------------------|------------|
| 0.52 | XP_027465354.1 | Zalophus californianus   | Permissive |
| 0.52 | XP_025713397.1 | Callorhinus ursinus      | Permissive |
| 0.47 | XP_023971279.1 | Physeter catodon         | Uncertain  |
| 0.45 | BAE72462.1     | Procyon lotor            | Uncertain  |
| 0.43 | XP_004415448.1 | Odobenus rosmarus diverg | Uncertain  |
| 0.42 | XP_015974412.1 | Rousettus aegyptiacus    | Uncertain  |
| 0.41 | XP_021536486.1 | Neomonachus schauinsland | Uncertain  |
| 0.39 | XP_029095806.1 | Monodon monoceros        | Uncertain  |
| 0.39 | XP_022418360.1 | Delphinapterus leucas    | Uncertain  |
| 0.39 | XP_010833001.1 | Bison bison bison        | Uncertain  |
| 0.38 | XP_024599894.1 | Neophocaena asiaorienta  | Uncertain  |
| 0.36 | XP_006911709.1 | Pteropus alecto          | Uncertain  |
| 0.36 | XP_011361275.1 | Pteropus vampyrus        | Uncertain  |
| 0.34 | XP_008839098.1 | Nannospalax galili       | Uncertain  |
| 0.32 | XP_029786256.1 | Suricata suricatta       | Uncertain  |
| 0.31 | XP_028020351.1 | Balaenoptera acutorostra | Uncertain  |
| 0.31 | XP_005358818.1 | Microtus ochrogaster     | Uncertain  |
| 0.30 | XP_019781177.1 | Tursiops truncatus       | Uncertain  |
| 0.29 | XP_004597549.2 | Ochotona princeps        | Uncertain  |
| 0.29 | XP_004269705.1 | Orcinus orca             | Uncertain  |
| 0.29 | XP_026951599.1 | Lagenorhynchus obliquide | Uncertain  |
| 0.28 | XP_030703991.1 | Globicephala melas       | Uncertain  |
| 0.27 | XP_020140826.1 | Microcebus murinus       | Uncertain  |
| 0.26 | XP_012494185.1 | Propithecus coquereli    | Uncertain  |
| 0.24 | XP_005316051.3 | Ictidomys tridecemlineat | Uncertain  |
| 0.22 | XP_026252506.1 | Urocitellus parryii      | Uncertain  |
| 0.22 | XP_015343540.1 | Marmota marmota marmota  | Uncertain  |
| 0.22 | XP_027802308.1 | Marmota flaviventris     | Uncertain  |
| 0.20 | XP_004866157.1 | Heterocephalus glaber    | Uncertain  |

|       |                |                          |               |
|-------|----------------|--------------------------|---------------|
| 0.19  | XP_017744069.1 | Rhinopithecus bieti      | Uncertain     |
| 0.18  | XP_010643477.1 | Fukomys damarensis       | Uncertain     |
| 0.18  | XP_012887573.1 | Dipodomys ordii          | Uncertain     |
| 0.17  | XP_028378317.1 | Phyllostomus discolor    | Uncertain     |
| 0.16  | XP_007951028.1 | Orycteropus afer afer    | Uncertain     |
| 0.16  | XP_006164754.1 | Tupaia chinensis         | Uncertain     |
| 0.16  | XP_023575316.1 | Octodon degus            | Uncertain     |
| 0.15  | XP_019522954.1 | Hipposideros armiger     | Uncertain     |
| 0.15  | XP_007466389.1 | Lipotes vexillifer       | Uncertain     |
| 0.15  | NP_001269290.1 | Chinchilla lanigera      | Uncertain     |
| 0.13  | XP_026910300.1 | Acinonyx jubatus         | Uncertain     |
| 0.13  | XP_004671523.1 | Jaculus jaculus          | Uncertain     |
| 0.12  | XP_023417808.1 | Cavia porcellus          | Uncertain     |
| 0.12  | XP_024425698.1 | Desmodus rotundus        | Uncertain     |
| 0.11  | XP_008062810.1 | Carlito syrichta         | Uncertain     |
| 0.10  | XP_023410960.1 | Loxodonta africana       | Uncertain     |
| 0.07  | XP_006892457.1 | Elephantulus edwardii    | Uncertain     |
| 0.05  | XP_003791912.1 | Otolemur garnettii       | Uncertain     |
| 0.05  | XP_028617961.1 | Grammomys surdaster      | Uncertain     |
| 0.04  | XP_030886750.1 | Leptonychotes weddellii  | Uncertain     |
| 0.01  | XP_004710002.1 | Echinops telfairi        | Uncertain     |
| 0.00  | XP_004449124.1 | Dasypus novemcinctus     | Uncertain     |
| 0.00  | XP_006835673.1 | Chrysochloris asiatica   | Uncertain     |
| -0.01 | NP_001012006.1 | Rattus norvegicus        | Nonpermissive |
| -0.02 | XP_001515597.2 | Ornithorhynchus anatinus | Nonpermissive |
| -0.02 | XP_031814825.1 | Sarcophilus harrisii     | Nonpermissive |
| -0.04 | XP_016058453.1 | Miniopterus natalensis   | Nonpermissive |
| -0.05 | XP_007500936.1 | Monodelphis domestica    | Nonpermissive |
| -0.17 | XP_031226742.1 | Mastomys coucha          | Nonpermissive |

|       |                |                          |               |
|-------|----------------|--------------------------|---------------|
| -0.18 | XP_006775273.1 | Myotis davidii           | Nonpermissive |
| -0.25 | XP_014399781.1 | Myotis brandtii          | Nonpermissive |
| -0.25 | XP_023609438.1 | Myotis lucifugus         | Nonpermissive |
| -0.27 | XP_021043935.1 | Mus pahari               | Nonpermissive |
| -0.66 | XP_010334925.1 | Saimiri boliviensis boli | Nonpermissive |
| -0.69 | XP_021009138.1 | Mus caroli               | Nonpermissive |
| -0.85 | XP_017367866.1 | Cebus capucinus imitator | Nonpermissive |
| -0.85 | XP_032141854.1 | Sapajus apella           | Nonpermissive |
| -0.94 | XP_012290105.1 | Aotus nancymae           | Nonpermissive |
| -1.08 | XP_027691156.1 | Vombatus ursinus         | Nonpermissive |
| -3.69 | XP_008987241.1 | Callithrix jacchus       | Nonpermissive |
| -3.83 | XP_020863153.1 | Phascolarctos cinereus   | Nonpermissive |
| -3.94 | NP_001123985.1 | Mus musculus             | Nonpermissive |
| -3.96 | XP_027986092.1 | Eptesicus fuscus         | Nonpermissive |

34

35 Supplementary Table 3. All  $10 \times 10 \times 10 = 1,000$  possible combinations of  $w_t := \{w_{t,1}, w_{t,2}, w_{t,3}\}$

| Prior     | Case                                                                                                                                              | Possible weights         |
|-----------|---------------------------------------------------------------------------------------------------------------------------------------------------|--------------------------|
| $w_{t,1}$ | The $t$ -th residue in the human ortholog is in the PD domain (19-615)                                                                            | 1,2,3,4,5,<br>6,7,8,9,10 |
|           | Otherwise                                                                                                                                         | 1                        |
| $w_{t,2}$ | The $t$ -th position is listed in Supplementary Table 1 (i.e., it is a key inconsistent residue between permissive and non-permissive orthologs ) | 1,2,3,4,5,<br>6,7,8,9,10 |
|           | Otherwise                                                                                                                                         | 1                        |
| $w_{t,3}$ | The $t$ -th residue in the human ortholog is in the contact surface (PDB ID: 6M0J) of human ACE2 with S protein                                   | 1,2,3,4,5,<br>6,7,8,9,10 |
|           | Otherwise                                                                                                                                         | 1                        |

36
